# Supplementary material for: Managing Peak-Hour Congestion in Urban Rail Transit with the Sub-Train Price Adjustment Strategy
Source: Hindawi journal article supplement (doi:10.1155/2022/3723630), 2022-05-13
Supplement: f1 [file 3723630.f1.docx]

Fare for the first train

Fare for the second train

Fare for the third train

Fare for the fourth train

Fare for the fifth train

Fare for the sixth train

Fare for the seventh train

Fare for the eighth train

Fare for the ninth train

Fare for the tenth train

Fare for the eleventh train

Fare for the twelfth train

Fare for the thirteenth train

Fare for the fourteenth train

Fare for the fifteenth train

Fare for the sixteenth train

Fare for the seventeenth train

Fare for the eighteenth train

Fare for the nineteenth train

Fare for the twentieth train
